# Supplementary material for: Validation of a Novel Immunoline Assay for Patient Stratification according to Virulence of the InfectingHelicobacter pyloriStrain and Eradication Status
Source: Hindawi journal article supplement (doi:10.1155/2017/8394593), 2017-01-01
Supplement: f2 [file 8394593.f2.pdf]

Supplementary data

**Validation of a novel immuno-line assay for patient stratification according to virulence of the infecting *Helicobacter pylori* strain and eradication status**

*Luca Formichella<sup>1</sup>, Laura Romberg<sup>1</sup>, Hannelore Meyer<sup>1</sup>, Christian Bolz<sup>1</sup>, Michael Vieth<sup>3</sup>, Michael Geppert<sup>2</sup>, Gereon Göttner<sup>4</sup>, Christina Nölting<sup>4</sup>, Wolfgang Schepp<sup>5</sup>, Arne Schneider<sup>5</sup>, Kurt Ulm<sup>6</sup>, Petra Wolf<sup>6</sup>, Ingrid Lisanne Holster<sup>7</sup>, Ernst J. Kuipers<sup>7</sup>, Bernd Birkner<sup>8</sup>, Erwin Soutschek<sup>4</sup>, Markus Gerhard<sup>#1,9</sup>*

| Histology                    | GERMANY (D)      |                  |                  |                  | NETHERLANDS (NL) |                  |                  |                  |
|------------------------------|------------------|------------------|------------------|------------------|------------------|------------------|------------------|------------------|
|                              | positive         | negative         | eradicated       | total            | positive         | negative         | eradicate<br>d   | total            |
| <b>N</b>                     | 409              | 447              | 435              | 1291             | 35               | 91               | 102              | 228              |
| <b>%</b>                     | 31.7             | 34.6             | 33.7             | 100              | 15.4             | 39.9             | 44.7             | 100              |
| <b>mean age</b>              | 52.7<br>(± 16.1) | 48.2<br>(± 16,6) | 59.3<br>(± 13.7) | 53.6<br>(± 16.2) | 62.8<br>(± 12.6) | 61.1<br>(± 10.6) | 61.5<br>(± 11.7) | 62.2<br>(± 11.3) |
| <b>Gender (f/m)</b>          | 0.53/0.47        | 0.55/0.45        | 0.59/0.41        | 0.55/0.45        | 0.63/0.37        | 0.49/0.51        | 0.40/0.60        | 0.48/0.52        |
| <b>Serology</b>              | 409              | 447              | 281              | 1137             | 35               | 91               | 102              | 228              |
| <b>mean recomLine score</b>  | 4.8<br>(± 1.9)   | 0.24<br>(± 0.8)  | 3.2<br>(± 1.8)   | N/A <sup>1</sup> | 5.1<br>(± 2.1)   | 2.7<br>(± 2.2)   | 3.4<br>(± 2.1)   | 2.5<br>(± 2.3)   |
| <b>recomLine +</b>           | 400 <sup>4</sup> | 40               | 210 <sup>4</sup> | 650              | 32               | 14               | 65 <sup>4</sup>  | 111              |
| <b>% recomLine +</b>         | 98.3             | 9.0              | 74.7             | 57.4             | 91.4             | 15.4             | 84.4             | 54.7             |
| <b>recomLine -</b>           | 7                | 404              | 71               | 482              | 3                | 77               | 12               | 92               |
| <b>% recomLine -</b>         | 1.7              | 91.0             | 25.3             | 42.6             | 8.6              | 84.6             | 15.6             | 45.3             |
| <b>Excluded for analysis</b> | 2 <sup>2</sup>   | 3 <sup>2</sup>   | 154 <sup>3</sup> | 159              | 35 <sup>1</sup>  | 91 <sup>1</sup>  | 25 <sup>3</sup>  | 151              |

Supplementary Table 1. Study Populations

<sup>1</sup>not applicable; <sup>2</sup>borderline; <sup>3</sup>no documentation; <sup>4</sup>included in analysis

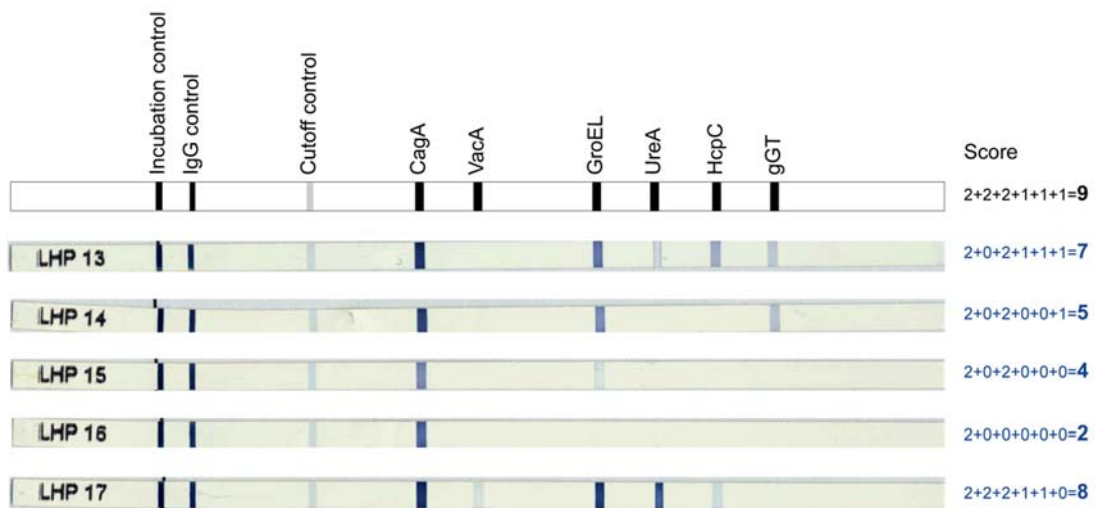

Supplementary Figure 1. The result of five representative *recomLine* tests incubated with individual patient sera are shown (LHP13 – LHP17). The assignment of the bands is given in the cartoon above. The test score calculation is given beside the *recomLine* tests. LHP 16 shows only a CagA band and thus represents a typical test result for an eradicated patient.

|           |          | Serology (recomLine) |          | total |
|-----------|----------|----------------------|----------|-------|
|           |          | positive             | negative |       |
| Histology | positive | 400                  | 7        | 407   |
|           | negative | 40*                  | 404      | 444   |
| total     |          | 440                  | 411      | 851   |

Supplementary Table 2. Cross Table Histology vs. Serology (recomLine)

Sensitivity (recomLine): 98.3%

Specificity (recomLine): 91.0%

\*Corrected Specificity (recomLine): 95.5%

(\*from 40 false positives, 21 presenting isolated CagA were considered as eradicated)

| <b>Chronicity of inflammation</b> |      |          |        |       |       |
|-----------------------------------|------|----------|--------|-------|-------|
|                                   | mild | moderate | severe | Total |       |
| <b>N</b>                          | 64   | 297      | 28     | 389   | p     |
| <b>CagA positivity (%)</b>        | 59.4 | 70.4     | 89.3   | 69.9  | 0.015 |
| <b>VacA positivity (%)</b>        | 17.2 | 20.2     | 46.4   | 21.6  | 0.004 |
| <b>GroEL positivity (%)</b>       | 90.6 | 85.5     | 89.3   | 86.6  | 0.506 |
| <b>UreA positivity (%)</b>        | 23.4 | 30.3     | 42.9   | 30.1  | 0.173 |
| <b>HcpC positivity (%)</b>        | 45.3 | 44.4     | 50.0   | 45.0  | 0.851 |
| <b>gGT positivity (%)</b>         | 46.9 | 54.9     | 57.1   | 53.7  | 0.473 |

| <b>Activity of inflammation</b> |      |          |        |       |        |
|---------------------------------|------|----------|--------|-------|--------|
|                                 | mild | moderate | severe | Total |        |
| <b>N</b>                        | 229  | 138      | 20     | 387   | p      |
| <b>CagA positivity (%)</b>      | 63.8 | 78.3     | 85.0   | 70.0  | 0.0044 |
| <b>VacA positivity (%)</b>      | 20.5 | 21.7     | 35.0   | 21.7  | 0.3226 |
| <b>GroEL positivity (%)</b>     | 87.3 | 84.1     | 95.0   | 86.6  | 0.3533 |
| <b>UreA positivity (%)</b>      | 29.7 | 29.0     | 45.0   | 30.2  | 0.3336 |
| <b>HcpC positivity (%)</b>      | 46.7 | 44.9     | 30.0   | 45.2  | 0.3536 |
| <b>gGT positivity (%)</b>       | 52.0 | 58.7     | 50.0   | 54.3  | 0.4228 |

Supplementary Table 3. Association between gastritis parameters and single *H. pylori* antigen positivity

|                             | Signs of pathology |         |            |       |       |       | p     |
|-----------------------------|--------------------|---------|------------|-------|-------|-------|-------|
|                             | absent             | atrophy | metaplasia | ulcer | GC    | Total |       |
| <b>N</b>                    | 299                | 22      | 53         | 16    | 3     | 393   |       |
| <b>CagA positivity (%)</b>  | 63.9               | 81.8    | 88.7       | 87.5  | 100.0 | 69.5  | 0.001 |
| <b>VacA positivity (%)</b>  | 19.7               | 31.8    | 24.5       | 31.3  | 66.7  | 21.9  | 0.157 |
| <b>GroEL positivity (%)</b> | 87.3               | 86.4    | 81.1       | 87.5  | 100.0 | 86.5  | 0.746 |
| <b>UreA positivity (%)</b>  | 29.8               | 18.2    | 34.0       | 43.8  | 0.0   | 30.0  | 0.333 |
| <b>HcpC positivity (%)</b>  | 47.5               | 31.8    | 35.8       | 43.8  | 33.3  | 44.8  | 0.373 |
| <b>gGT positivity (%)</b>   | 53.2               | 63.6    | 52.8       | 56.3  | 66.7  | 53.9  | 0.885 |

Supplementary Table 4. Association between most severe lesions and single antigen *H. pylori* positivity

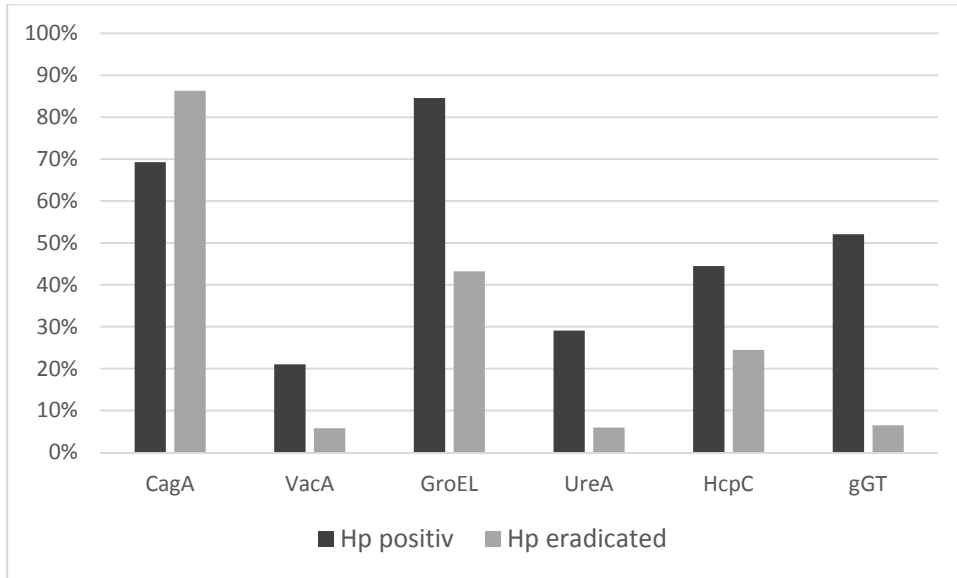

Supplementary Figure 2. Antigen frequencies of *H. pylori* positive and eradicated patients. CagA was significantly ( $p < 0.01$ ) more often positive in eradicated patients (86.3%) than in *H. pylori* positive patients (69.2%), while all other immune responses were lower in the eradicated cohort.
